# Supplementary material
Source: publisher figshare collection journal article supplement (https://acs.figshare.com/ndownloader/files/32389680)
Supplement: Supplementary file 1 [file 32389680]

# Supporting information

## Electrochemical Formation of Covalent-Ionic Stage-1

### Graphite Intercalation Compound with Trifluoroacetic Acid

*Bartosz Gurzęda<sup>1,2\*</sup>, Tae In Kim<sup>3</sup>, Madi Arsakay<sup>1,3</sup>, Myeonggi Choe<sup>1,4</sup>, Sun Hwa Lee<sup>1</sup>,  
Zonghoon Lee<sup>1,4</sup>, Seung Kyu Min<sup>1,3\*</sup>, Rodney S. Ruoff<sup>d,3,4,5\*</sup>*

<sup>1</sup>Center for Multidimensional Carbon Materials (CMCM), Institute for Basic Science (IBS),  
Ulsan 44919, Republic of Korea

<sup>2</sup>Institute of Chemistry and Technical Electrochemistry, Poznan University of Technology,  
Berdychowo 4, 60965 Poznan, Poland

<sup>3</sup>Department of Chemistry, Ulsan National Institute of Science and Technology (UNIST), Ulsan  
44919, Republic of Korea

<sup>4</sup>Department of Materials Science and Engineering, Ulsan National Institute of Science and  
Technology (UNIST), Ulsan 44919, Republic of Korea

<sup>5</sup>School of Energy and Chemical Engineering, Ulsan National Institute of Science and  
Technology (UNIST), Ulsan 44919, Republic of Korea

#### **\*Corresponding authors:**

E-mail: bartosz.gurzeda@put.poznan.pl (B. Gurzęda)

E-mail: skmin@unist.ac.kr (S. K. Min)

E-mail: ruofflab@gmail.com (R. S. Ruoff)

## Table of Contents

|                                                      |   |
|------------------------------------------------------|---|
| 1. Construction of the working electrode             | 2 |
| 2. Stability of the stage-1 CF <sub>3</sub> COOH-GIC | 2 |
| 3. Detailed XRD calculations                         | 4 |
| 4. CF <sub>3</sub> COOH-GIC formula calculations     | 7 |
| 5. CF <sub>3</sub> COOH-GIC computational details    | 8 |

### 1. Construction of the working electrode

Figure S1 shows the construction of the working electrode. Polytetrafluoroethylene (PTFE) parts are chemically and electrochemically inert to the electrolyte. Platinum mesh provides good electrical contact with the graphite flakes and the electrolyte has free access to the graphite surface.

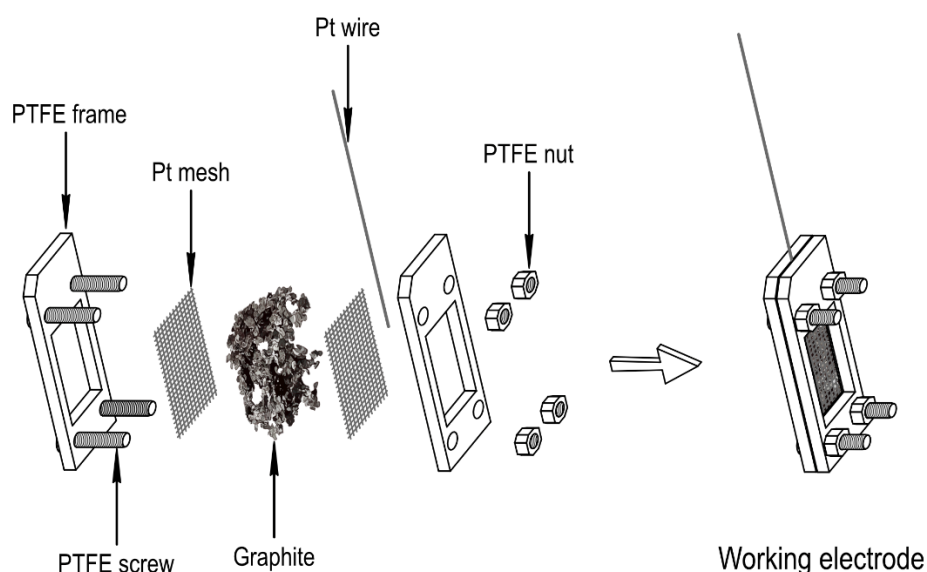

**Figure S1.** Construction of the working electrode.

### 2. Stability of the stage-1 CF<sub>3</sub>COOH-GIC

The prepared GIC550 product was placed in a glass vial and left open in a fume hood. The sample was then weighed every few days. Figure S2 shows the percent weight loss of the sample over time. XRD patterns of the GIC550, GIC550 after 30 days and also after 90 days are shown in Figure S3.

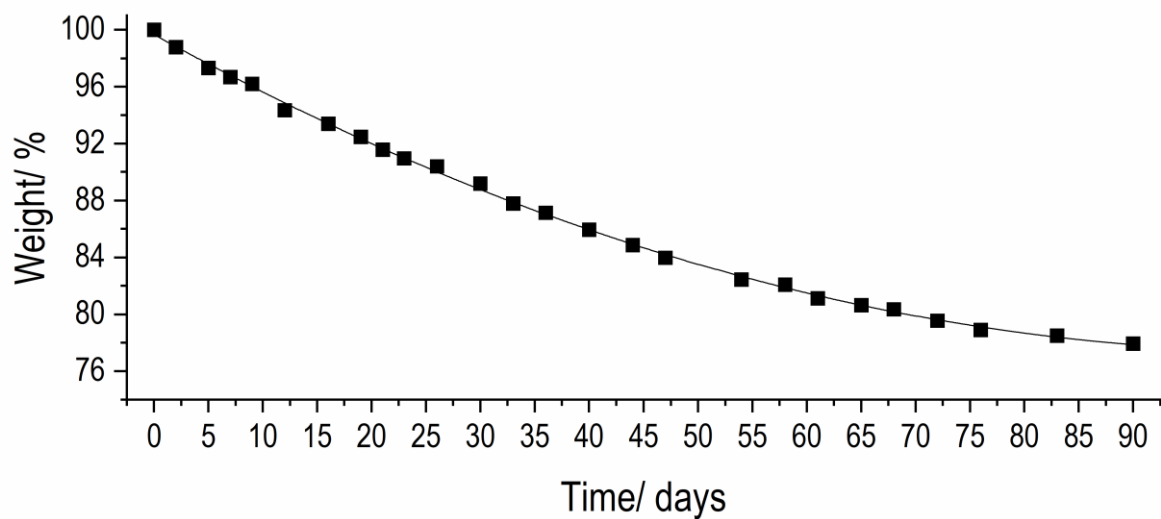

**Figure S2.** The GIC550 percent weight loss as a function of time.

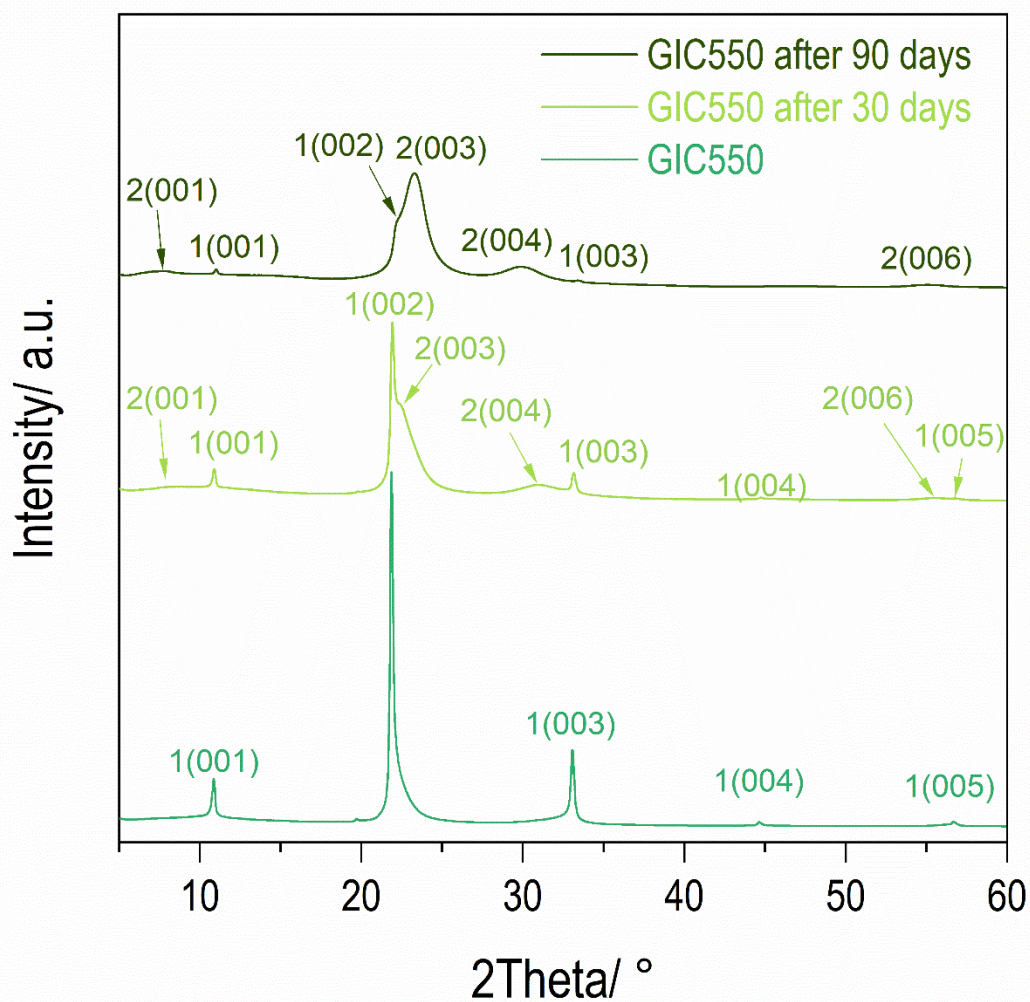

**Figure S3.** XRD patterns of the GIC550 immediately after the synthesis and after 30 and 90 days.

### 3. Detailed XRD calculations

Calculated theoretical peak positions for different stages of CF<sub>3</sub>COOH-GIC are given in Table S1. Calculated d-spacing for GIC products based on the recorded XRD patterns (Figure S5) are given in Table S2.

**Table S1.** Calculated theoretical peak positions for CF<sub>3</sub>COOH-GIC.

|             | Peak position/ °    |                      |                      |                      |
|-------------|---------------------|----------------------|----------------------|----------------------|
| (00l) index | stage-1<br>(8.10 Å) | stage-2<br>(11.45 Å) | stage-3<br>(14.80 Å) | stage-4<br>(18.15 Å) |
| (001)       | 10.914              | 7.715                | 5.967                | 4.865                |
| (002)       | 21.928              | 15.465               | 11.95                | 9.738                |
| (003)       | 33.153              | 23.287               | 17.966               | 14.629               |
| (004)       | 44.716              | 31.221               | 24.033               | 19.548               |
| (005)       | 56.783              | 39.312               | 30.168               | 24.503               |
| (006)       |                     | 47.613               | 36.393               | 29.505               |
| (007)       |                     | 56.189               | 42.733               | 34.565               |
| (008)       |                     |                      | 49.212               | 39.696               |
| (009)       |                     |                      | 55.864               | 44.911               |
| (0010)      |                     |                      |                      | 50.226               |
| (0011)      |                     |                      |                      | 55.66                |

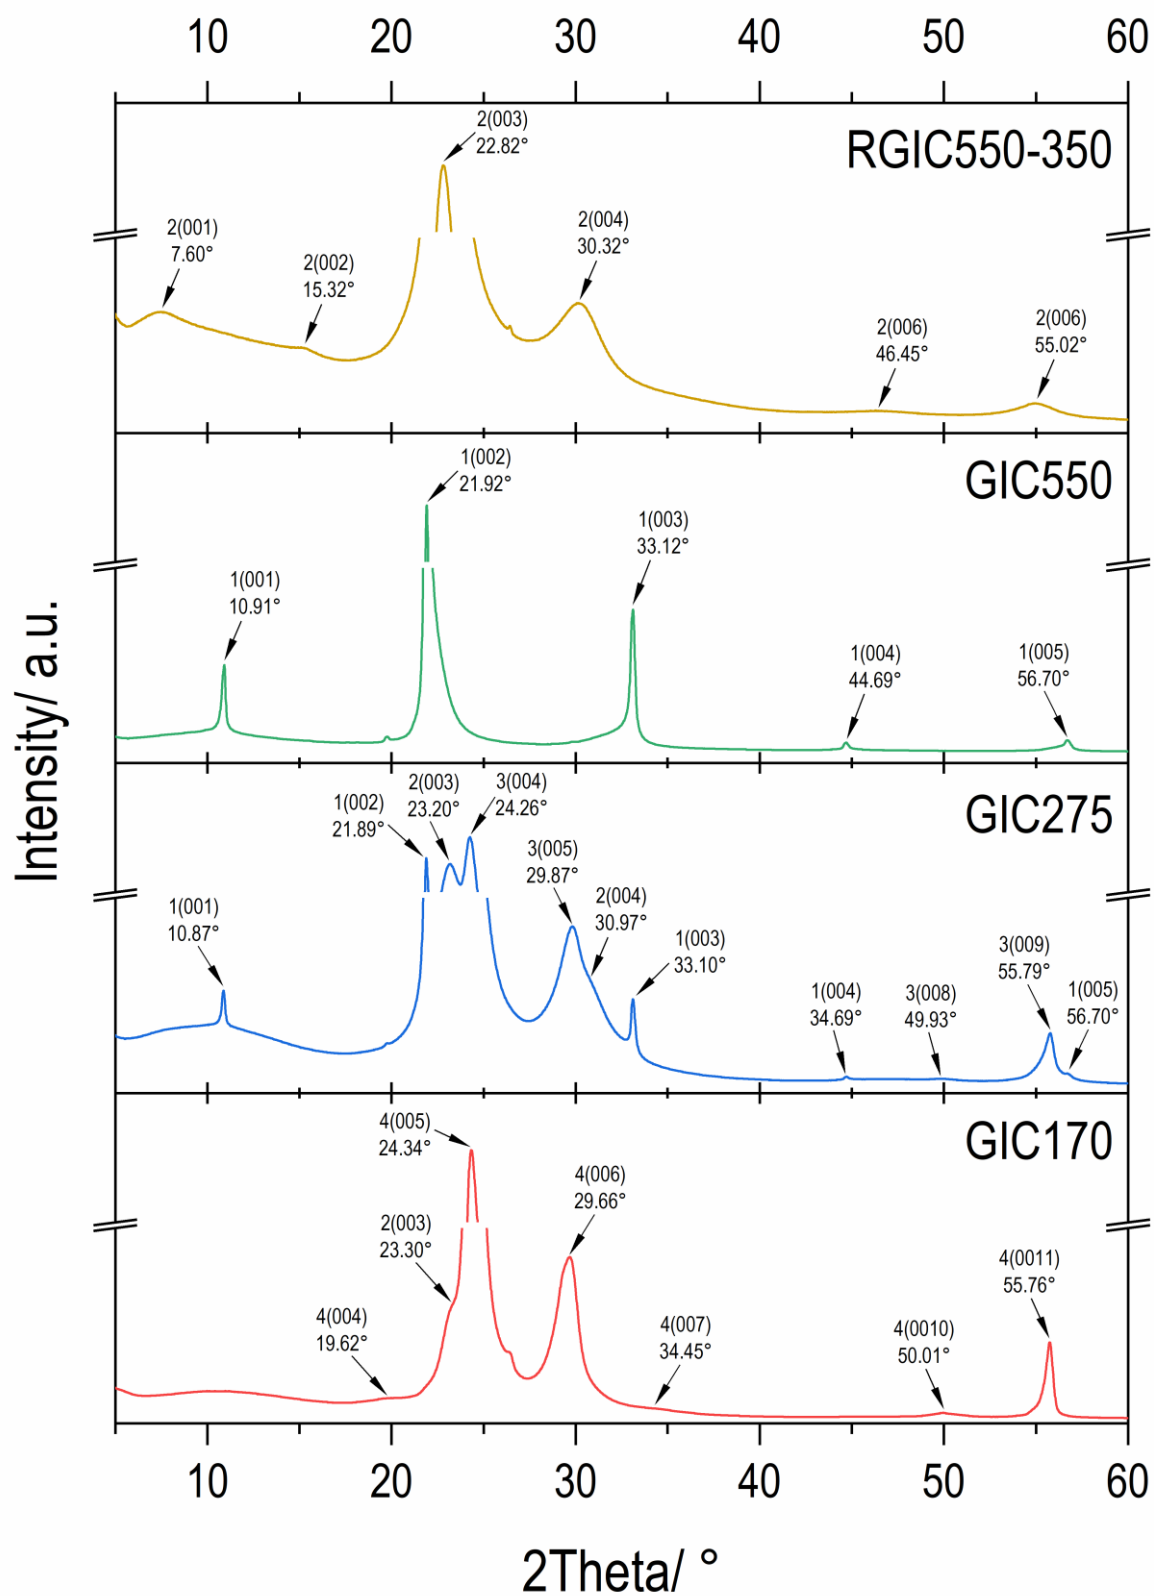

**Figure S4.** XRD patterns of prepared  $\text{CF}_3\text{COOH}$  intercalated samples detailing all the diffraction peaks.

**Table S2.** Calculated interlayer spacings  $d_i$  for the GIC products based on the recorded XRD patterns.

| (00l)<br>index | GIC170                 |           |                        |           | GIC275                 |           |                        |           |                        |           | GIC550                 |           | RGIC550-350            |           |
|----------------|------------------------|-----------|------------------------|-----------|------------------------|-----------|------------------------|-----------|------------------------|-----------|------------------------|-----------|------------------------|-----------|
|                | stage-2                |           | stage-4                |           | stage-1                |           | stage-2                |           | stage-3                |           | stage-1                |           | stage-2                |           |
|                | peak<br>position/<br>° | $d_i$ / Å |
| (001)          |                        |           |                        |           | 10.87                  | 8.13      |                        |           |                        |           | 10.91                  | 8.10      | 7.60                   | 11.62     |
| (002)          |                        |           |                        |           | 21.89                  | 8.11      |                        |           |                        |           | 21.92                  | 8.10      | 15.32                  | 11.56     |
| (003)          | 23.30                  | 11.44     |                        |           | 33.10                  | 8.11      | 23.20                  | 11.49     |                        |           | 33.12                  | 8.11      | 22.82                  | 11.68     |
| (004)          |                        |           | 19.62                  | 18.08     | 44.69                  | 8.10      | 30.97                  | 11.54     | 24.26                  | 14.66     | 44.69                  | 8.10      | 30.32                  | 11.78     |
| (005)          |                        |           | 24.34                  | 18.27     | 56.70                  | 8.11      |                        |           | 29.87                  | 14.94     | 56.70                  | 8.11      |                        |           |
| (006)          |                        |           | 29.66                  | 18.06     |                        |           |                        |           |                        |           |                        |           | 46.45                  | 11.72     |
| (007)          |                        |           | 34.45                  | 18.21     |                        |           |                        |           |                        |           |                        |           | 55.02                  | 11.67     |
| (008)          |                        |           |                        |           |                        |           |                        |           | 49.93                  | 14.60     |                        |           |                        |           |
| (009)          |                        |           |                        |           |                        |           |                        |           | 55.79                  | 14.81     |                        |           |                        |           |
| (0010)         |                        |           | 50.01                  | 18.22     |                        |           |                        |           |                        |           |                        |           |                        |           |
| (0011)         |                        |           | 55.76                  | 18.12     |                        |           |                        |           |                        |           |                        |           |                        |           |

#### 4. CF<sub>3</sub>COOH-GIC formula calculations

We note that the average percent mass increase for the stage-1 GIC is 81%. Based on this knowledge and the Reaction S1, we are able to calculate how many moles of carbon react with 1 mole of trifluoroacetic acid (Equation S2):

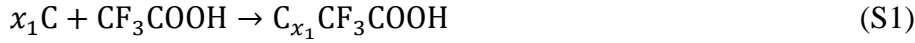

$$x_1 = \frac{m_{\text{graphite}} \cdot M_{\text{CF}_3\text{COOH}}}{M_{\text{C}} \cdot (m_{\text{graphite}} - m_{\text{GIC}})} \quad (\text{S2})$$

where  $m_{\text{graphite}}$  is the mass of the starting graphite,  $m_{\text{GIC}}$  is the mass of the stage-1 GIC product, and  $M_{\text{CF}_3\text{COOH}}$  and  $M_{\text{C}}$  are the molar masses of trifluoroacetic acid and graphite, respectively. The calculated  $x_1$  is 11.73. Therefore, it is concluded that one molecule of trifluoroacetic acid “reacts” with 12 atoms of carbon.

The electrical charge passed in the intercalation reaction relates directly to the electron transfer. Based on the charge consumed for the stage- $n$  GIC formation, we can calculate the number of carbon atoms positively charged during the formation of stage-1 CF<sub>3</sub>COOH-GIC (Equation S3):

$$x_2 = \frac{F}{Q_{\text{GIC}}} \quad (\text{S3})$$

where  $F$  is a Faraday’s constant, equal to 96485.33 C mol<sup>-1</sup>, and  $Q_{\text{GIC}}$  is a charge consumed for the stage-1 GIC formation in C mol<sup>-1</sup>. Because electrolyte is also decomposing during the electrochemical formation of stage-1 GIC, we are not able to calculate  $Q_{\text{GIC}}$  based on a galvanostatic curve. To get the information about the charge consumed for GIC formation we electrooxidize the graphite using linear sweep voltammetry. In this case, we are able to separate the charge used for GIC formation from the charge “lost” for the parasitic reactions (Figure S5). The pure stage-1 CF<sub>3</sub>COOH-GIC was formed when the potential 1.66 V was reached. The recorded charge for the GIC formation is equal to 336 C g<sup>-1</sup> and that is 4032 C mol<sup>-1</sup> of graphite. Therefore,  $x_2$  calculated using Equation (3) is 23.93. That means that 24 atoms of carbon were “positively charged” during the stage-1 GIC formation. Taking into account the  $x_1$  and  $x_2$  values, 2 trifluoroacetic species react with 24 atoms of carbon, and one of them is negatively charged to counterbalance the positive charge of the carbon atoms, thus the formula of the prepared stage-1 GIC is C<sub>24</sub>OOCF<sub>3</sub><sup>+</sup>CF<sub>3</sub>COO<sup>-</sup>.

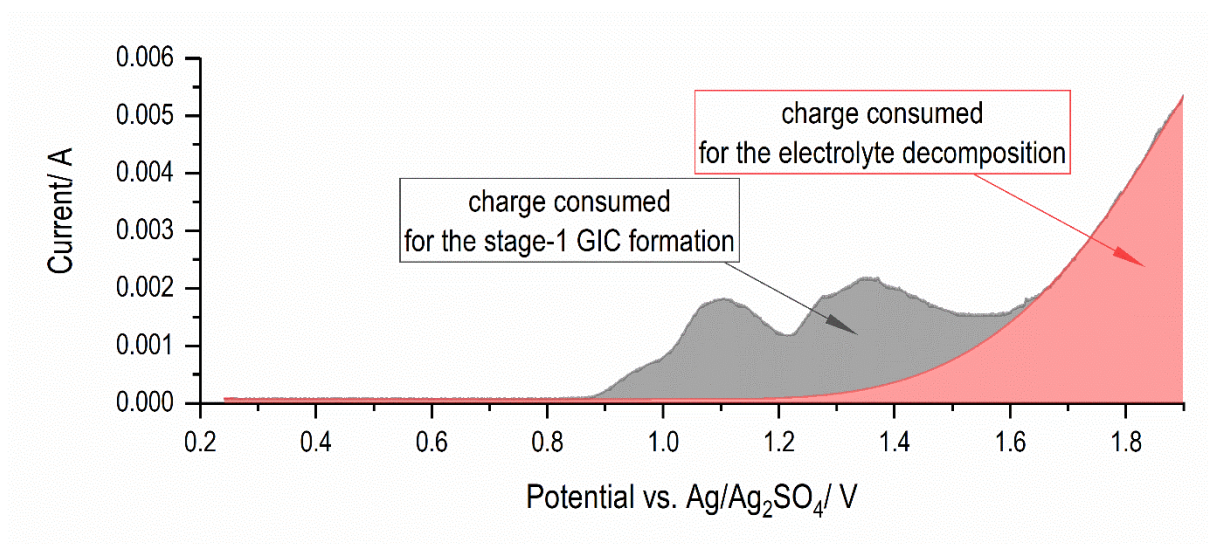

**Figure S5.** Linear sweep voltammetry curve recorded during the oxidation of graphite in a 0.5 M solution of  $\text{CH}_3\text{COONH}_4$  in a 9:1 volume ratio mixture of  $\text{CF}_3\text{COOH}$  and  $\text{CH}_3\text{COOH}$ . Scan rate:  $0.025 \text{ mV s}^{-1}$ .

## 5. $\text{CF}_3\text{COOH}$ -GIC computational details

We performed density functional theory (DFT) calculations to understand structures of GICs with trifluoro acetic acids for the stage-1 and stage-2 intercalation stage. We conducted two different calculations to investigate energetics of possible molecular configurations. First, we conducted periodic boundary calculations to evaluate 2D graphene layers and intercalated  $\text{CF}_3\text{COO}^-$ ,  $\text{CF}_3\text{COO}^\cdot$  or  $\text{CF}_3\text{COOH}$ . In addition, we further calculated molecular geometries with cluster systems with a coronene ( $\text{C}_{24}\text{H}_{12}$ ) instead of the graphene layer since the periodic boundary calculations may not be suitable for the system with two layers with different lattice constants. We did frequency calculations to generate infrared vibrational spectra from the cluster calculation. A goal of the theoretical calculations is to estimate molecular structures of Stage-1 and Stage-2 to compare with experimental results.

The initial structures and atomic charge analysis are described in Figure S6 and Figure S7, respectively. All normal modes from frequency calculations in Molden format is provided as a separate file. Here, the  $[\text{coronene-OC(=O)CF}_3]^+\text{CF}_3\text{COO}^-$  shows one imaginary frequency which describes out-of-plane vibrations at the edge. We expect that the hydrogen out-of-plane vibration diminishes as the coronene is replaced by the graphene sheet.



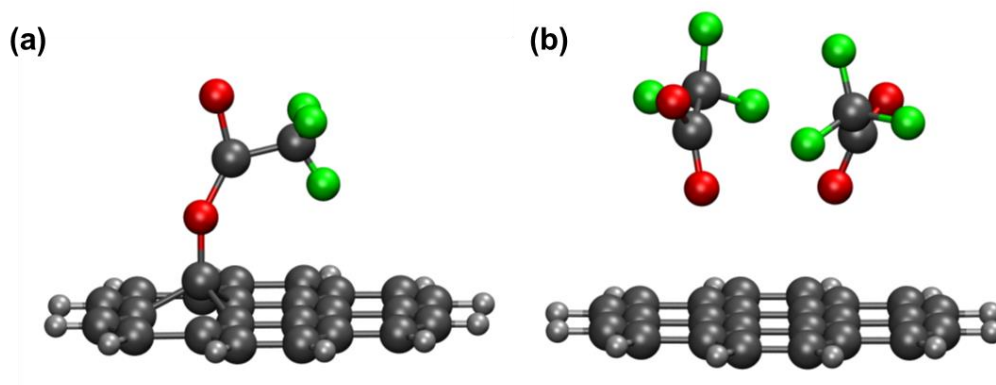

**Figure S6** Initial configurations to obtain the structures in Figure 12 in the main text. (a) Coronene- $\text{CF}_3\text{COO}$  and (b) coronene- $(\text{CF}_3\text{COO})_2$  complexes. Depending on the charge of the system, we obtain different bonding characters as described in Figure 12.

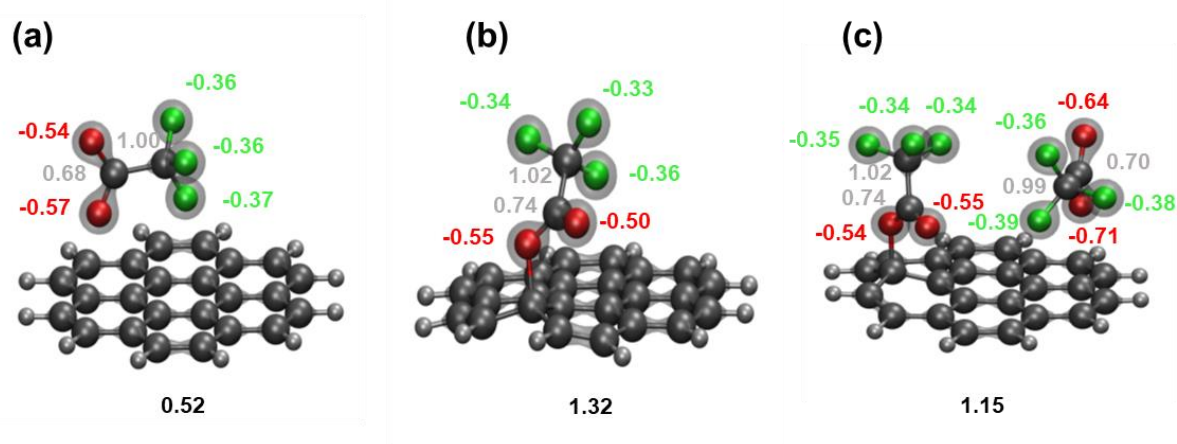

**Figure S7.** Charge density plots and corresponding atomic charges in coronene complexes. The indicated values represent the natural bond orbital (NBO) atomic charges for carbon (grey), fluorine (green), and oxygen (red) atoms.

We use the Vienna Ab initio Software Package (VASP)<sup>1</sup> with Perdew-Becke-Ernzerhof (PBE) functional<sup>2</sup> for periodic calculations. We choose a kinetic energy cutoff as 500 eV, k-points as (4x3x3) and (4x3x2) Monkhorst-Pack grids for stage-1 and stage-2, respectively, and the threshold for the geometry optimization as 0.01 eV/Å. In addition, we use Grimme-D3 dispersion corrections to account for van der Waals interactions.<sup>3</sup> To describe a charged unit cell, we consider a uniform counter charge over the unit cell. For coronene complexes, we calculated structures and vibrational frequencies based on density functional theory calculations at the B3LYP/6-31+G\* level of theory with the TeraChem (v1.95P) program package.<sup>4</sup> Here, we also use Grimme-D3 dispersion corrections. For the frequency calculations, we use the scaling factor of 0.96.

We performed phonon calculations with the energy cutoff of 700 eV at the optimized unit cell and structure without the dispersion interaction to see the dynamic stability of the structure (d) in Figure 15. The optimized structure shows the covalent bonds between the graphene sheet and  $\text{CF}_3\text{COO}$ s. Figure S8 shows the phonon band which shows mostly positive phonon frequencies except three imaginary frequencies. The three imaginary frequencies correspond to the translational modes at the G-point which should be identically zero analytically. Figure S9 represents three translational modes corresponding to the small imaginary frequencies. We obtain imaginary frequencies due to the numerical instability. We expect the positive-definite phonon frequencies as we increase the numerical accuracy.

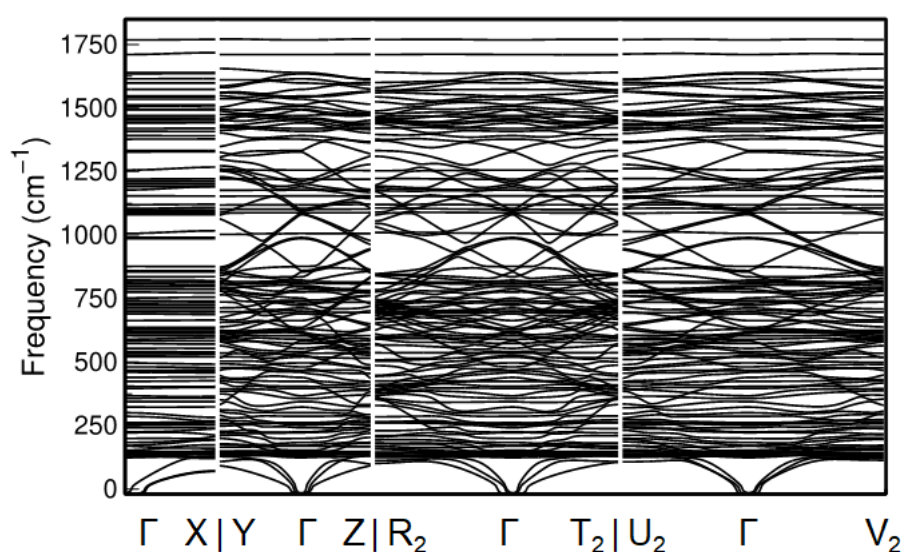

**Figure S8.** The phonon dispersion relation of the structure (d) of Figure 15 in the main text.

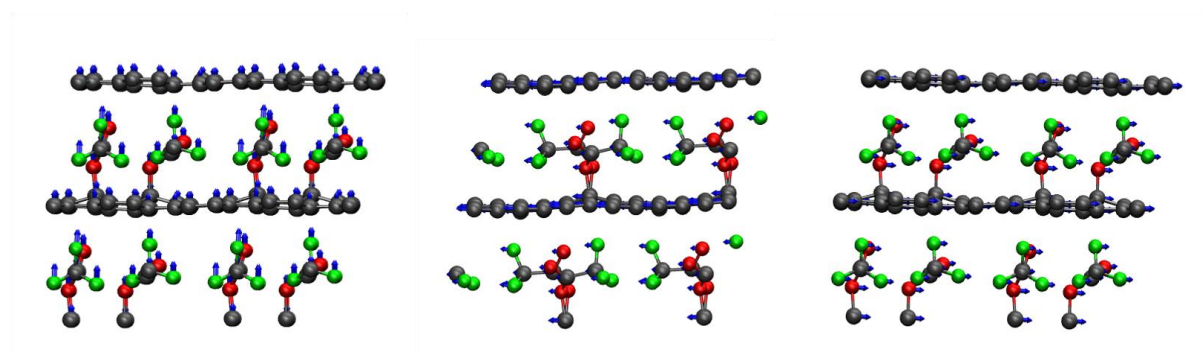

**Figure S9.** Three acoustic modes with the imaginary frequencies at the G-point.

## References:

- (1) Kresse, G.; Furthmüller, J. Efficient Iterative Schemes for Ab Initio Total-Energy Calculations Using a Plane-Wave Basis Set. *Phys. Rev. B* **1996**, *54*, 11169.
- (2) Perdew, J. P.; Burke, K.; Ernzerhof, M. Generalized Gradient Approximation Made Simple. *Phys. Rev. Lett.* **1996**, *77*, 3865.
- (3) Grimme, S.; Antony, J.; Ehrlich, S.; Krieg, H. A Consistent and Accurate Ab Initio Parametrization of Density Functional Dispersion Correction (DFT-D) for the 94 Elements H-Pu. *J. Chem. Phys.* **2010**, *132*, 154104.
- (4) Seritan, S.; Bannwarth, C.; Fales, B. S.; Hohenstein, E. G.; Kokkila-Schumacher, S. I. L.; Luehr, N.; Snyder Jr., J. W.; Song, C.; Titov, A. V.; Ufimtsev, I. S.; Martínez, T. J. TeraChem: Accelerating Electronic Structure and Ab Initio Molecular Dynamics with Graphical Processing Units. *J. Chem. Phys.* **2020**, *152*, 224110.
